# Supplementary material
Source: PubMed Central journal article supplement (PMC10991330)

Figure 1

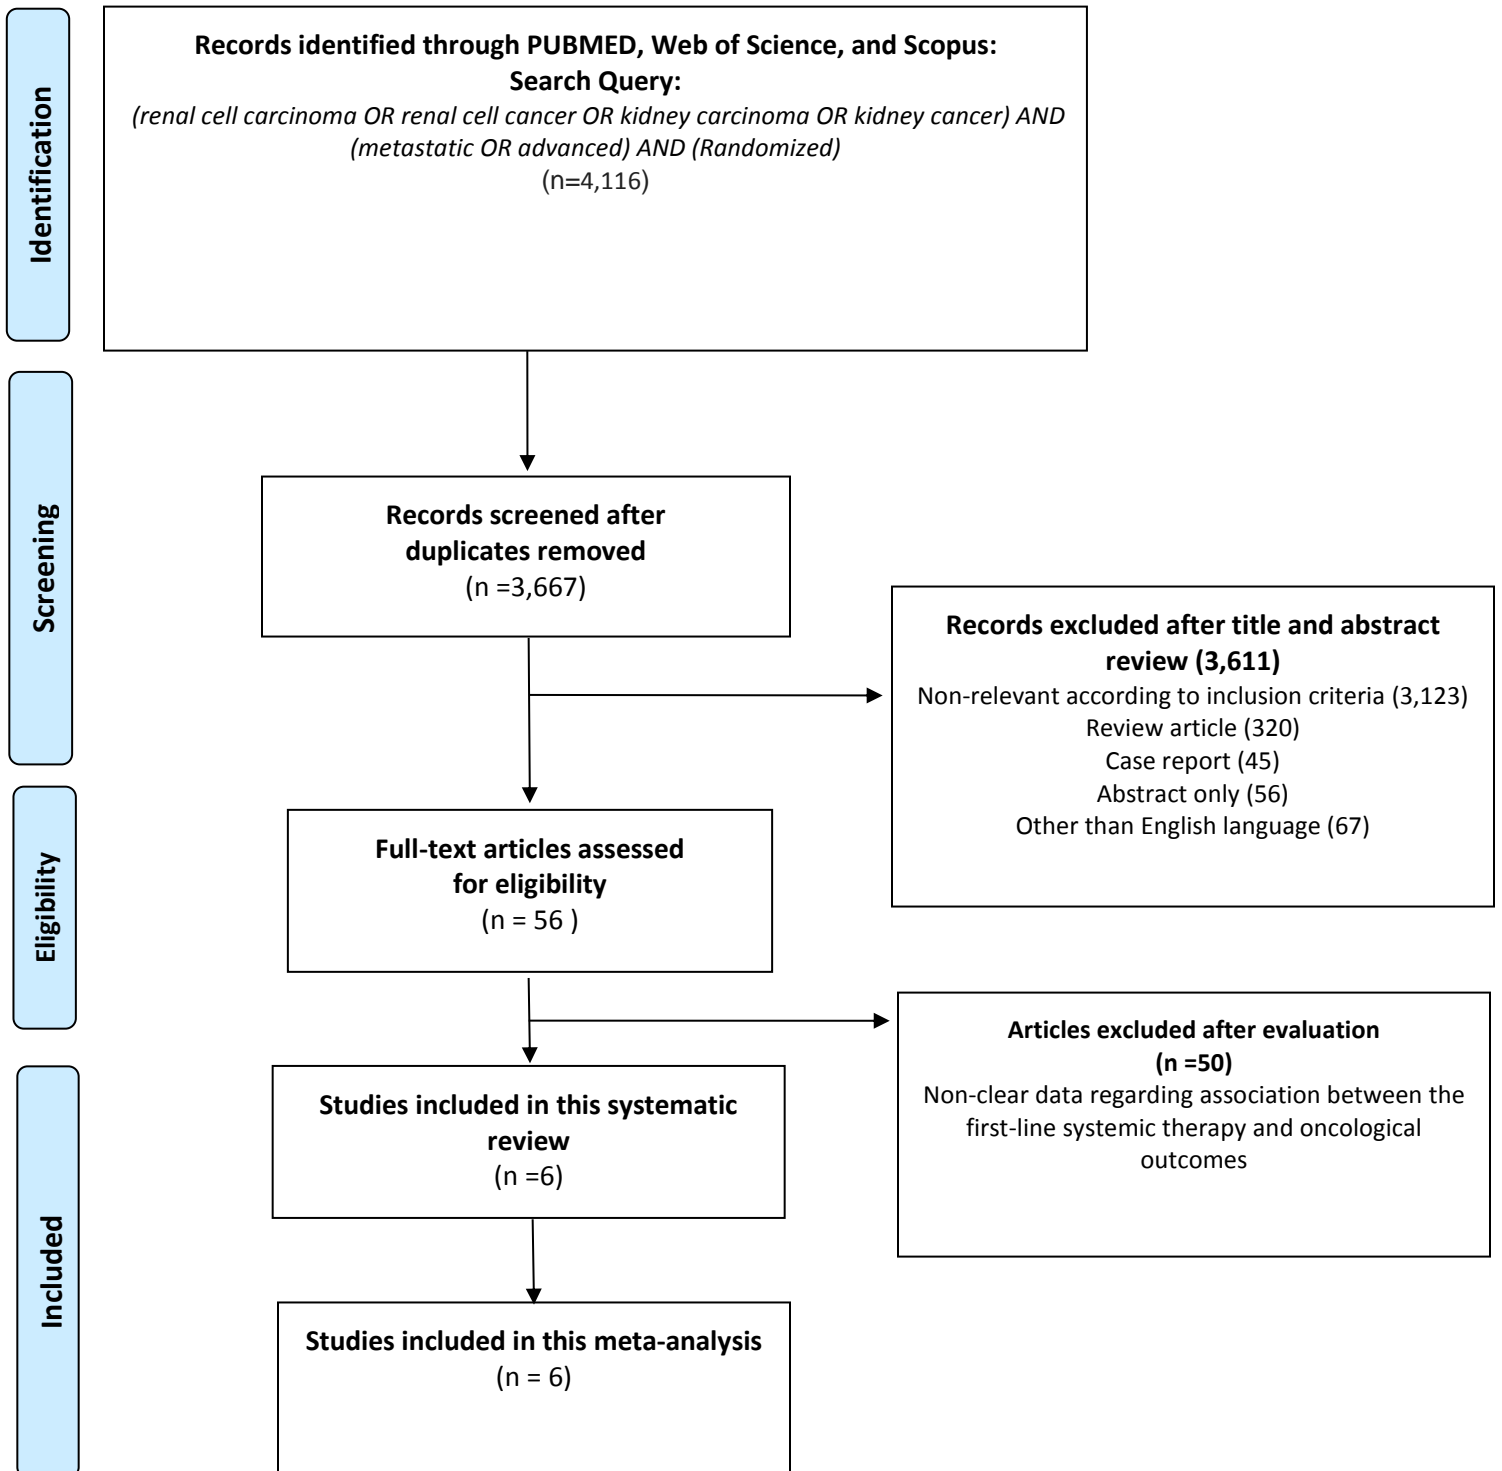

Supplement: 262_2020_2684_MOESM1_ESM.pdf [file 262_2020_2684_MOESM1_ESM.pdf]
