# Supplementary material
Source: PubMed Central journal article supplement (PMC10991330)
Supplement: 262_2020_2684_MOESM2_ESM.pdf [file 262_2020_2684_MOESM2_ESM.pdf]

### Supplementary Figure 1

Risk of bias summary of the included studies for network meta-analysis

(A) Random sequence generation (selection bias); (B) allocation concealment (selection bias); (C) blinding of participants and personal (performance bias); (D) blinding of outcome assessment (detection bias); (E) incomplete outcome data (attrition bias); (F) selective reporting (reporting bias); (G) other bias. Green circles represent a low risk of bias and confounding, red circles represent a high risk of bias and confounding, and yellow circles represent an unclear risk of bias and confounding.

| <i>Author, year</i>                   | <i>A</i> | <i>B</i> | <i>C</i> | <i>D</i> | <i>E</i> | <i>F</i> | <i>G</i> |
|---------------------------------------|----------|----------|----------|----------|----------|----------|----------|
| <i>Rini 2019</i>                      | ●        | ●        | ●        | ●        | ●        | ●        | ●        |
| <i>Plimack 2020</i>                   | ●        | ?        | ●        | ●        | ●        | ●        | ●        |
| <i>Rini 2016</i>                      | ●        | ●        | ●        | ●        | ●        | ●        | ●        |
| <i>Motzer 2013</i>                    | ●        | ?        | ●        | ●        | ●        | ●        | ●        |
| <i>Motzer 2019 (CheckMate214)</i>     | ●        | ?        | ●        | ●        | ●        | ●        | ●        |
| <i>Motzer 2019(JAVELIN Renal 101)</i> | ●        | ?        | ●        | ●        | ●        | ●        | ●        |
