# Supplementary material
Source: PubMed Central journal article supplement (PMC10991330)

Supplementary Figure 2

Network plots showing the association of systemic therapy in metastatic renal cell carcinoma

A. Progression free survival

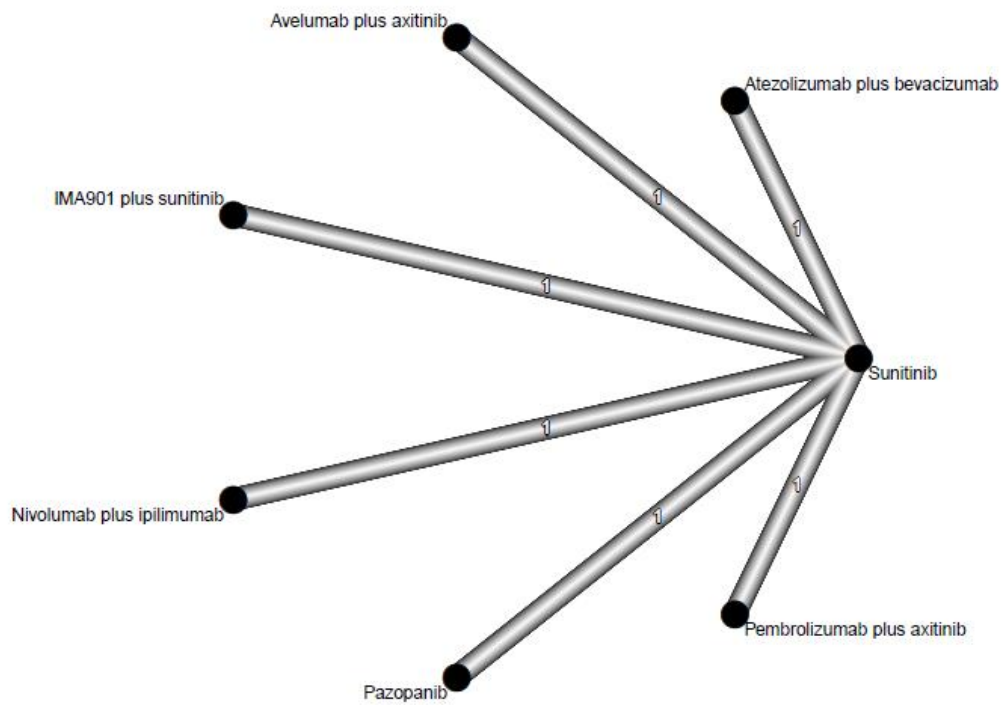

B. Overall survival

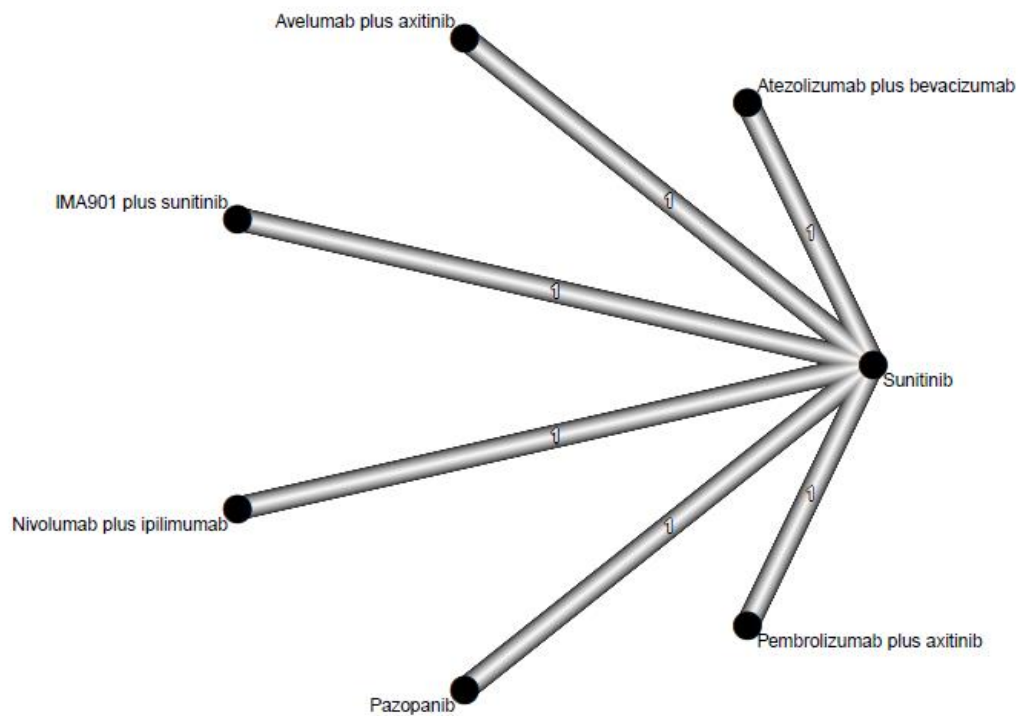

C. Adverse event

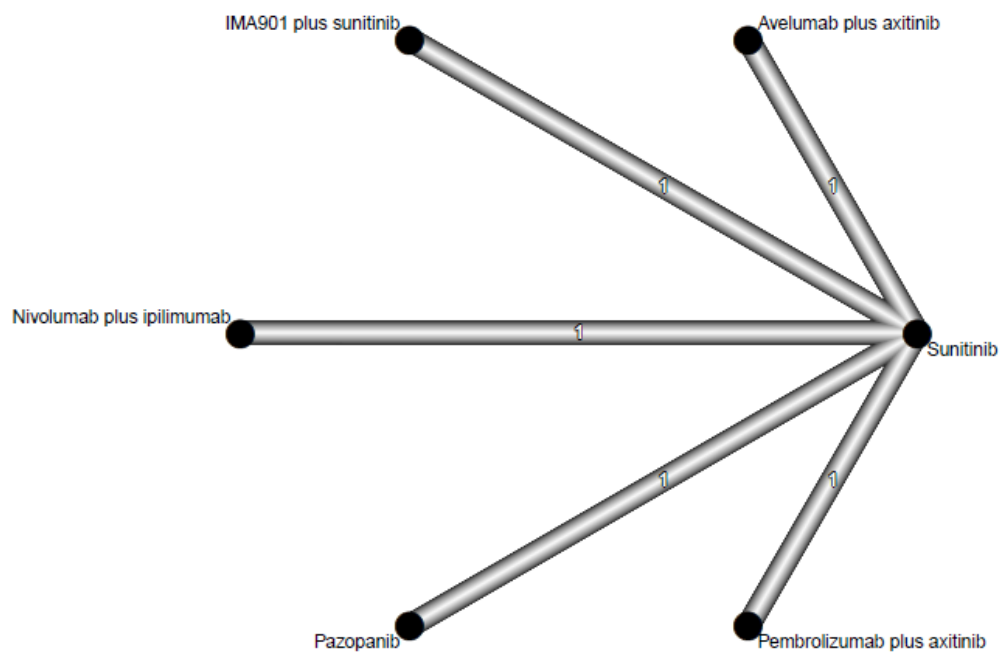

Supplement: 262_2020_2684_MOESM3_ESM.pdf [file 262_2020_2684_MOESM3_ESM.pdf]
