# Supplementary material
Source: PubMed Central journal article supplement (PMC10991330)

Supplementary Figure 3

Forest plots

A. Overall survival (Intermediate/poor-risk)

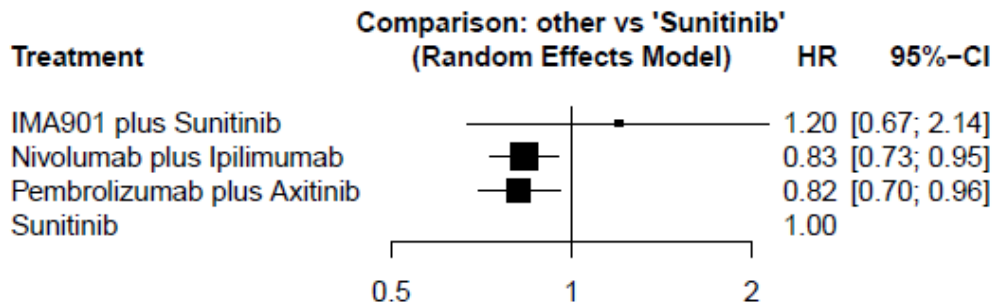

B. Progression free survival (Intermediate/poor-risk)

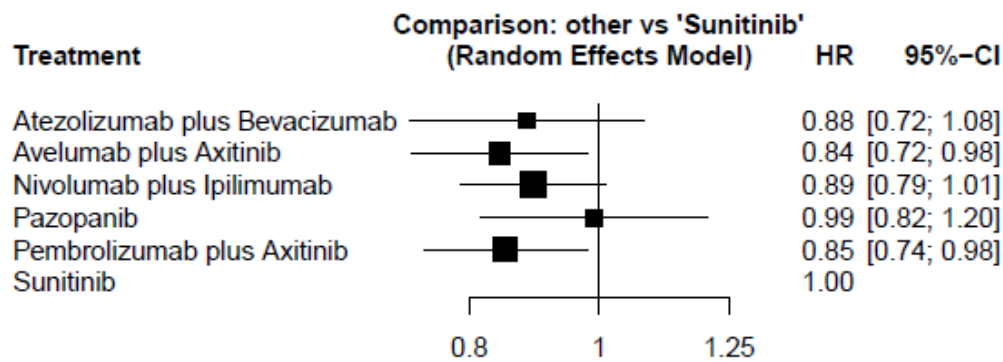

C. Overall survival (favorable-risk)

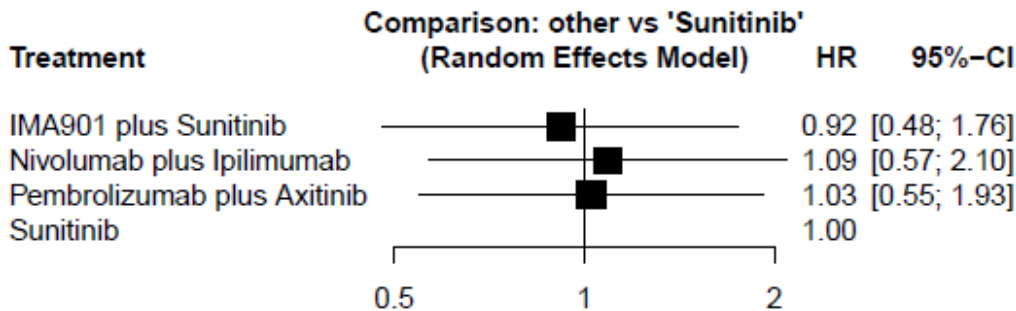

D. Progression free survival (favorable-risk)

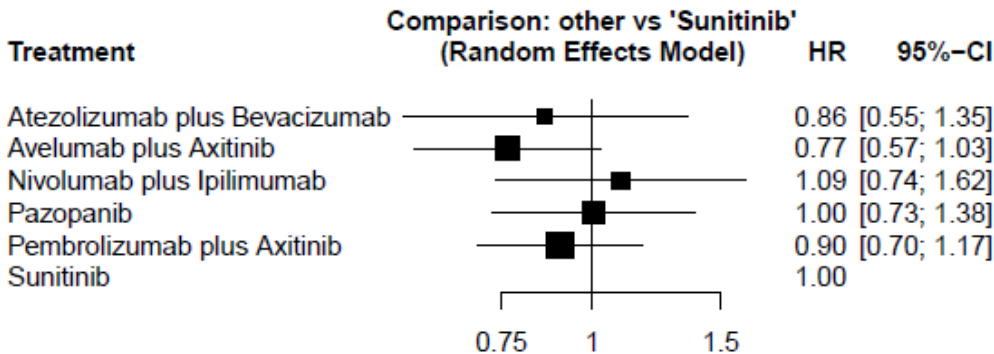

Supplement: 262_2020_2684_MOESM4_ESM.pdf [file 262_2020_2684_MOESM4_ESM.pdf]
