# Supplementary material
Source: PubMed Central journal article supplement (PMC10991330)
Supplement: 262_2020_2684_MOESM6_ESM.pdf [file 262_2020_2684_MOESM6_ESM.pdf]

Supplementary Table 2 Analysis of the treatment ranking

| Objective response            |                 |                  |
|-------------------------------|-----------------|------------------|
| Treatment                     | P score (fixed) | P score (random) |
| Avelumab plus axitinib        | 0.9855          | 0.9855           |
| Pembrolizumab plus axitinib   | 0.8132          | 0.8132           |
| Nivolumab plus ipilimumab     | 0.4645          | 0.4645           |
| Pazopanib                     | 0.4486          | 0.4486           |
| Atezolizumab plus bevacizumab | 0.2556          | 0.2556           |
| Sunitinb                      | 0.0326          | 0.0326           |
| Complete response             |                 |                  |
| Treatment                     | P score (fixed) | P score (random) |
| Nivolumab plus ipilimumab     | 0.9742          | 0.9742           |
| Pembrolizumab plus axitinib   | 0.6998          | 0.6998           |
| Atezolizumab plus bevacizumab | 0.601           | 0.601            |
| Avelumab plus axitinib        | 0.4763          | 0.4763           |
| Sunitinb                      | 0.1822          | 0.1822           |
| Pazopanib                     | 0.0665          | 0.0665           |
