# Supplementary material
Source: PubMed Central journal article supplement (PMC10991330)
Supplement: 262_2020_2684_MOESM7_ESM.pdf [file 262_2020_2684_MOESM7_ESM.pdf]

Supplementary Table 3 Analysis of the treatment ranking

| Intermediate / poor risk      |                 |                  |                             |                 |                  |
|-------------------------------|-----------------|------------------|-----------------------------|-----------------|------------------|
| Progression free survival     |                 |                  | Overall survival            |                 |                  |
| Treatment                     | P score (fixed) | P score (random) | Treatment                   | P score (fixed) | P score (random) |
| Avelumab plus axitinib        | 0.7582          | 0.8317           | Pembrolizumab plus axitinib | 0.822           | 0.822            |
| Pembrolizumab plus axitinib   | 0.7293          | 0.6402           | Nivolumab plus ipilimumab   | 0.7677          | 0.7677           |
| Atezolizumab plus bevacizumab | 0.5911          | 0.567            | Sunitinb                    | 0.2465          | 0.2465           |
| Nivolumab plus ipilimumab     | 0.5657          | 0.4106           | IMA901 plus sunitinib       | 0.1638          | 0.1638           |
| Pazopanib                     | 0.2274          | 0.3953           |                             |                 |                  |
| Sunitinb                      | 0.1282          | 0.3572           |                             |                 |                  |
| Favorable risk                |                 |                  |                             |                 |                  |
| Progression free survival     |                 |                  | Overall survival            |                 |                  |
| Treatment                     | P score (fixed) | P score (random) | Treatment                   | P score (fixed) | P score (random) |
| Avelumab plus axitinib        | 0.848           | 0.848            | IMA901 plus sunitinib       | 0.6136          | 0.6136           |
| Atezolizumab plus bevacizumab | 0.6265          | 0.6265           | Sunitinb                    | 0.5103          | 0.5103           |
| Pembrolizumab plus axitinib   | 0.5792          | 0.5792           | Pembrolizumab plus axitinib | 0.4752          | 0.4752           |
| Pazopanib                     | 0.3656          | 0.3656           | Nivolumab plus ipilimumab   | 0.4009          | 0.4009           |
| Sunitinb                      | 0.3396          | 0.3396           |                             |                 |                  |
| Nivolumab plus ipilimumab     | 0.2411          | 0.2411           |                             |                 |                  |
